# Supplementary material for: Empagliflozin-Enhanced Antioxidant Defense Attenuates Lipotoxicity and Protects Hepatocytes by Promoting FoxO3a- and Nrf2-Mediated Nuclear Translocation via the CAMKK2/AMPK Pathway
Source: MDPI journal article supplement (doi:10.3390/antiox11050799), 2022-04-19
Supplement: s1 [file s1]

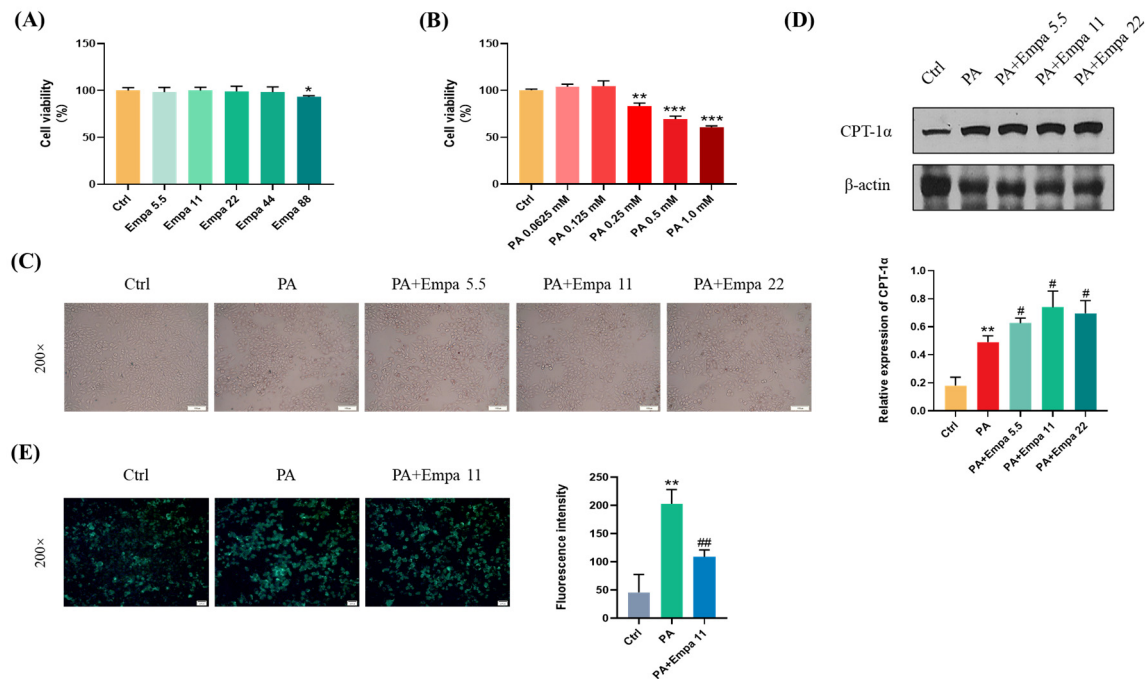

**Figure S1.** The cytotoxicity of Empa and PA in LO2 cells and the effects of Empa on lipid metabolism and intracellular  $Ca^{2+}$  concentration in the PA-treated LO2 cells. **(A)** Effect of Empa (5.5–88  $\mu$ M) on cell viability of LO2 cells, and the result was analyzed by MTT assay. **(B)** PA showed significant cytotoxicity at concentrations above 0.25mM in LO2 cells. **(C)** Intracellular lipid content was assessed by Oil red O staining, and the result showed that Empa had no significant effect on lipid accumulation in PA (0.5mM)-treated LO2 cell lines. **(D)** Empa treatment further significantly increased CPT-1 $\alpha$  expression in LO2 cells. **(E)** Empa remarkably dampened intracellular  $Ca^{2+}$  concentration in PA-treated LO2 cells. All data are expressed as mean  $\pm$  SD (n=3). \* $p$  < 0.05, \*\* $p$  < 0.01 and \*\*\* $p$  < 0.001 versus Ctrl. # $p$  < 0.05 and ## $p$  < 0.01 versus PA. Ctrl, PA-untreated normal control group; Empa 5.5–88, Empa-treated (at final concentrations of 5.5–88  $\mu$ M) control group; PA, PA-treated control group; PA+Empa 5.5–22, PA-treated and Empa-treated (at final concentrations of 5.5–22  $\mu$ M) groups.

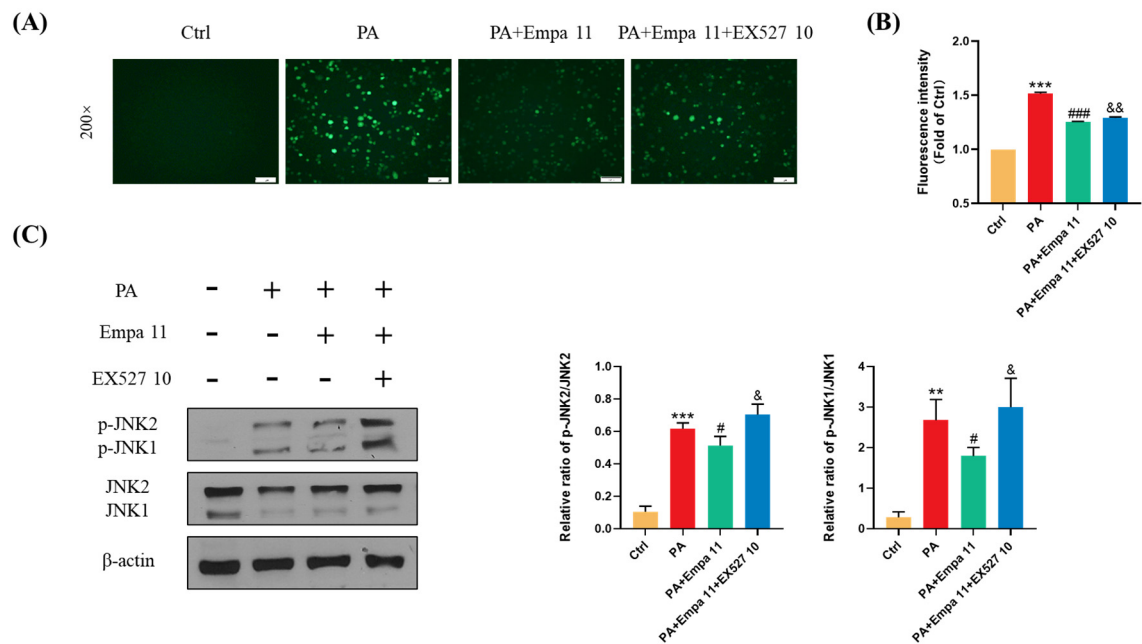

**Figure S2.** EX527 increased cellular ROS level and the phosphorylation of JNK in LO2 cells. (A,B) EX527 (10  $\mu$ M) increased intracellular ROS production in PA-treated and Empa-treated LO2 cells. (C) EX527 significantly upregulated phosphorylation level of JNK1 and JNK2 in PA-treated and Empa-treated LO2 cells. All data are expressed as mean  $\pm$  SD (n=3). \*\*p < 0.01 and \*\*\*p < 0.001 versus Ctrl; #p < 0.05 and ###p < 0.001 versus PA; &p < 0.05 and &&p < 0.01 versus PA+Empa 11. Ctrl, PA-untreated normal control group; PA, PA-treated control group; PA+Empa 11, PA-treated and Empa-treated (at final concentrations of 11  $\mu$ M) group; PA+Empa 11+EX527 10, PA-treated, Empa-treated (at final concentrations of 11  $\mu$ M) and EX527-treated (at final concentrations of 10  $\mu$ M) group.

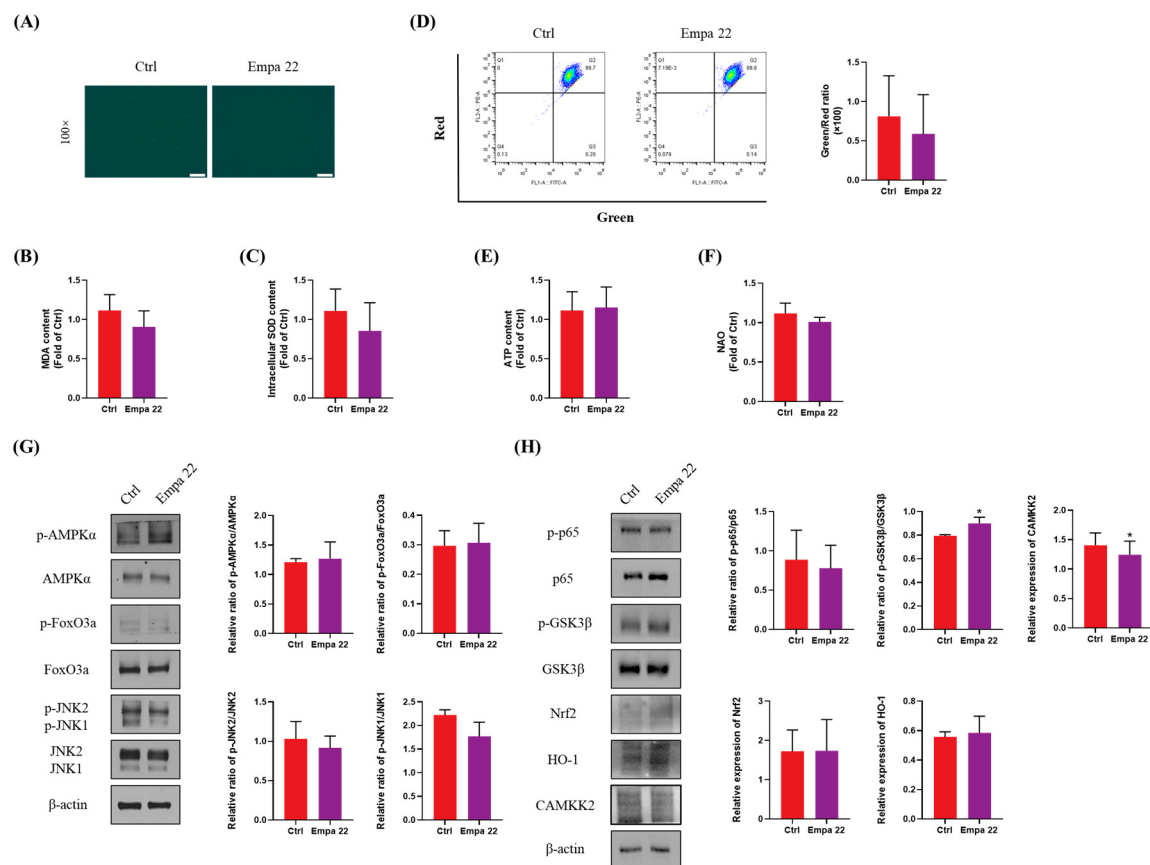

**Figure S3.** Effects of Empa on normal LO2 cell lines. (A) Effect of Empa (22  $\mu$ M) on ROS generation in PA-untreated LO2 cells. (B) Effect of Empa (22  $\mu$ M) on MDA content in PA-untreated LO2 cells. (C) Effect of Empa (22  $\mu$ M) on SOD content in PA-untreated LO2 cells. (D) Effect of Empa (22  $\mu$ M) on mitochondrial membrane potential in PA-untreated LO2 cells. (E) Effect of Empa (22  $\mu$ M) on ATP production in PA-untreated LO2 cells. (F) Effect of Empa (22  $\mu$ M) on mitochondrial mass in PA-untreated LO2 cells. (G) Effects of Empa (22  $\mu$ M) on the phosphorylation of AMPK $\alpha$ , FoxO3a, JNK1 and JNK2 in PA-untreated LO2 cells. (H) Effects of Empa (22  $\mu$ M) on the phosphorylation of p65 and GSK3 $\beta$  as well as the protein expression level of Nrf2, HO-1 and CAMKK2 in PA-untreated LO2 cells. All data are expressed as mean  $\pm$  SD (n=3). \*p < 0.05 versus Ctrl. Ctrl, normal control group; Empa 22, Empa-treated (at final concentrations of 22  $\mu$ M) control group.
